# Supplementary material
Source: PubMed Central journal article supplement (PMC3067926)
Supplement: supp_85_6_2818__1.pdf [file supp_85_6_2818__1.pdf]

**KINASE INHIBITORS**

| PLATE | COMPOUND NAME OR ID NUMBER           | M.W.  | TARGET             | uM   | LUC-1st | LUC-2nd |
|-------|--------------------------------------|-------|--------------------|------|---------|---------|
| B1    | PD-98059                             | 267.3 | only inhibits acti | 10   | 163%    | 101%    |
| B2    | U-0126                               | 380.5 | both active and i  | 10   | 121%    | 41%     |
| B3    | SB-203580                            | 377.4 | p38 MAPK           | 10   | 109%    | 35%     |
| B4    | H-7                                  | 364.3 | PKA, PKG, MLC      | 10   | 57%     | 20%     |
| B5    | H-9                                  | 324.3 | PKA, PKG, MLC      | 10   | 89%     | 18%     |
| B6    | Staurosporine                        | 466.5 | Pan-specific       | 0.01 | 113%    | 40%     |
| B7    | AG-494                               | 280.3 | EGFRK, PDGFF       | 10   | 92%     | 35%     |
| B8    | AG-825                               | 397.5 | HER1-2             | 10   | 94%     | 36%     |
| B9    | Lavendustin A                        | 381.4 | EGFRK              | 10   | 89%     | 47%     |
| B10   | RG-14620                             | 274.1 | EGFRK              | 10   | 101%    | 56%     |
| B11   | Tyrphostin 23                        | 186.1 | EGFRK              | 10   | 108%    | 58%     |
| B12   | Tyrphostin 25                        | 202.1 | EGFRK              | 10   | 115%    | 172%    |
| C1    | Tyrphostin 46                        | 204.2 | EGFRK, PDGFI       | 10   | 132%    | 116%    |
| C2    | Tyrphostin 47                        | 220.2 | EGFRK              | 10   | 129%    | 54%     |
| C3    | Tyrphostin 51                        | 268.2 | EGFRK              | 10   | 107%    | 31%     |
| C4    | Tyrphostin 1                         | 184.2 | Negative control   | 10   | 109%    | 23%     |
| C5    | Tyrphostin AG 1288                   | 231.2 | Tyrosine kinases   | 10   | 103%    | 19%     |
| C6    | Tyrphostin AG 1478                   | 315.8 | EGFRK              | 10   | 80%     | 16%     |
| C7    | Tyrphostin AG 1295                   | 234.3 | Tyrosine kinases   | 10   | 90%     | 36%     |
| C8    | Tyrphostin 9                         | 282.4 | PDGFRK             | 1    | 17%     | 0%      |
| C9    | HNMPA (Hydroxy-2-naphthalenylmethyl  | 238.2 | IRK (insulin rece  | 10   | 107%    | 37%     |
| C10   | Damnacanthal                         | 282.3 | p56 lck            | 1    | 122%    | 31%     |
| C11   | Piceatannol                          | 244.3 | Syk                | 10   | 102%    | 83%     |
| C12   | PP1                                  | 281.4 | Src family         | 10   | 99%     | 198%    |
| D1    | AG-490                               | 294.3 | JAK-2              | 1    | 142%    | 122%    |
| D2    | AG-126                               | 215.2 | IRAK               | 10   | 124%    | 94%     |
| D3    | AG-370                               | 259.3 | PDGFRK             | 10   | 128%    | 54%     |
| D4    | AG-879                               | 316.5 | NGFRK              | 10   | 11%     | 0%      |
| D5    | LY 294002                            | 307.4 | PI 3-K             | 10   | 57%     | 5%      |
| D6    | Wortmannin                           | 428.4 | PI 3-K             | 10   | 87%     | 25%     |
| D7    | GF 109203X                           | 412.5 | PKC                | 10   | 88%     | 25%     |
| D8    | Hypericin                            | 504.4 | PKC                | 1    | 84%     | 19%     |
| D9    | Ro 31-8220                           | 553.7 | PKC                | 1    | 105%    | 28%     |
| D10   | Sphingosine                          | 299.5 | PKC                | 10   | 88%     | 39%     |
| D11   | H-89                                 | 519.2 | PKA                | 10   | 97%     | 52%     |
| D12   | H-8                                  | 338.3 | PKA, PKG           | 10   | 86%     | 43%     |
| E1    | HA-1004                              | 329.8 | PKA, PKG           | 10   | 123%    | 80%     |
| E2    | HA-1077                              | 327.8 | PKA, PKG           | 10   | 92%     | 50%     |
| E3    | HDBA (2-Hydroxy-5-(2,5-dihydroxybenz | 275.3 | EGFRK, CaMK        | 10   | 100%    | 48%     |
| E4    | KN-62                                | 721.9 | CaMK II            | 1    | 101%    | 28%     |
| E5    | KN-93                                | 501   | CaMK II            | 10   | 87%     | 25%     |
| E6    | ML-7                                 | 452.7 | MLCK               | 10   | 49%     | 31%     |
| E7    | ML-9                                 | 361.3 | MLCK               | 0.5  | 90%     | 33%     |
| E8    | 2-Aminopurine                        | 135.1 | p58 PITSLRE bε     | 10   | 101%    | 28%     |
| E9    | N9-Isopropyl-olomoucine              | 326.4 | CDK                | 10   | 61%     | 15%     |
| E10   | Olomoucine                           | 298.3 | CDK                | 10   | 84%     | 19%     |

|     |                                        |       |                   |     |      |      |
|-----|----------------------------------------|-------|-------------------|-----|------|------|
| E11 | iso-Olomoucine                         | 298.4 | Negative control  | 10  | 95%  | 40%  |
| E12 | Roscovitine                            | 354.5 | CDK               | 10  | 42%  | 20%  |
| F1  | 5-Iodotubercidin                       | 392.2 | ERK2, adenosin    | 0.5 | 80%  | 27%  |
| F2  | LFM-A13                                | 360   | BTK               | 10  | 103% | 38%  |
| F3  | SB-202190                              | 331.3 | p38 MAPK          | 10  | 104% | 52%  |
| F4  | PP2                                    | 301.8 | Src family        | 10  | 95%  | 44%  |
| F5  | ZM 336372                              | 389.4 | cRAF              | 10  | 90%  | 39%  |
| F6  | SU 4312                                | 264.3 | Fik1              | 10  | 98%  | 42%  |
| F7  | AG-1296                                | 266.3 | PDGFRK            | 10  | 102% | 29%  |
| F8  | GW 5074                                | 520.9 | cRAF              | 1   | 90%  | 35%  |
| F9  | Palmitoyl-DL-carnitine Cl              | 436.1 | PKC               | 1   | 85%  | 30%  |
| F10 | Rottlerin                              | 516.6 | PKC delta         | 1   | 94%  | 21%  |
| F11 | Genistein                              | 270.2 | Tyrosine Kinase:  | 10  | 107% | 25%  |
| F12 | Daidzein                               | 254.2 | Negative control  | 10  | 100% | 127% |
| G1  | Erbstatin analog                       | 194   | EGFRK             | 1   | 104% | 103% |
| G2  | Quercetin dihydrate                    | 338.3 | PI 3-K            | 1   | 102% | 46%  |
| G3  | SU1498                                 | 390.5 | Fik1              | 10  | 106% | 37%  |
| G4  | ZM 449829                              | 182.2 | JAK-3             | 10  | 95%  | 44%  |
| G5  | BAY 11-7082                            | 207.3 | IKK pathway       | 10  | 76%  | 33%  |
| G6  | DRB (5,6-Dichloro-1-β-D-ribofuranos    | 319.1 | CK II             | 10  | 54%  | 5%   |
| G7  | HBDDE (2,2',3,3',4,4'-Hexahydroxy-1,1' | 338.4 | PKC alpha, PKC    | 10  | 77%  | 39%  |
| G8  | SP 600125                              | 220.2 | JNK               | 10  | 97%  | 30%  |
| G9  | Indirubin                              | 262   | GSK-3beta, CDK    | 10  | 80%  | 36%  |
| G10 | Indirubin-3'-monoxime                  | 277.3 | GSK-3beta         | 10  | 96%  | 22%  |
| G11 | Y-27632                                | 338.3 | ROCK (Rho-ass     | 10  | 129% | 40%  |
| G12 | Kenpaullone                            | 327.2 | GSK-3beta         | 10  | 105% | 109% |
| H1  | Terreic acid                           | 154.1 | BTK               | 10  | 80%  | 146% |
| H2  | Triciribine                            | 320.3 | Akt signaling pat | 10  | 78%  | 83%  |
| H3  | BML-257                                | 326.4 | Akt               | 10  | 76%  | 34%  |
| H4  | SC-514                                 | 224.3 | IKK2              | 10  | 88%  | 29%  |
| H5  | BML-259                                | 260.4 | Cdk5/p25          | 10  | 79%  | 44%  |
| H6  | Apigenin                               | 270.2 | CK-II             | 10  | 69%  | 7%   |
| H7  | BML-265 (Erlotinib analog)             | 305.4 | EGFRK             | 10  | 53%  | 41%  |
| H8  | Rapamycin                              | 914.2 | mTOR              | 10  | 57%  | 25%  |
